# Supplementary material for: A series of intriguing metal–organic frameworks with 3,3′,4,4′- benzophenonetetracarboxylic acid: structural adjustment and pH-dependence
Source: Royal Society of Chemistry journal article supplement (doi:10.1039/b805727c), 2008-01-01

## Supporting Information

**Title:** A Series of Intriguing Metal–Organic Frameworks with 3,3',4,4'-Benzophenonetetracarboxylic Acid: Structural Adjustment and pH-Dependent

**Authors:** Hong Wang,<sup>a</sup> Yao-Yu Wang,<sup>\*a</sup> Guo-Ping Yang,<sup>a</sup> Cui-Juan Wang,<sup>a</sup> Gui-Lin Wen,<sup>a</sup> Qi-Zhen Shi<sup>a</sup> and Stuart R. Batten<sup>\*b</sup>

**Scheme S1**

**Figure S1**

**Figure S2**

**Figure S3**

**Figure S4**

**Figure S5**

**Figure S6**

**Figure S7**

**Figure S8**

**Figure S9**

**Figure S10**

**Figure S11**

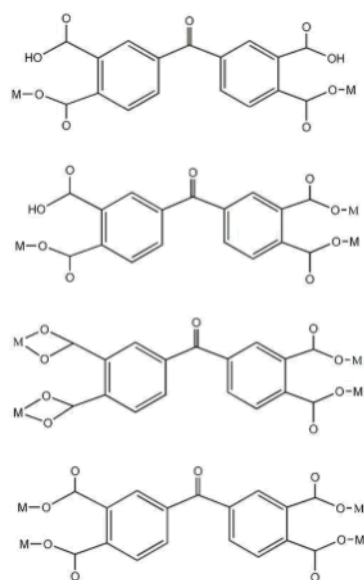

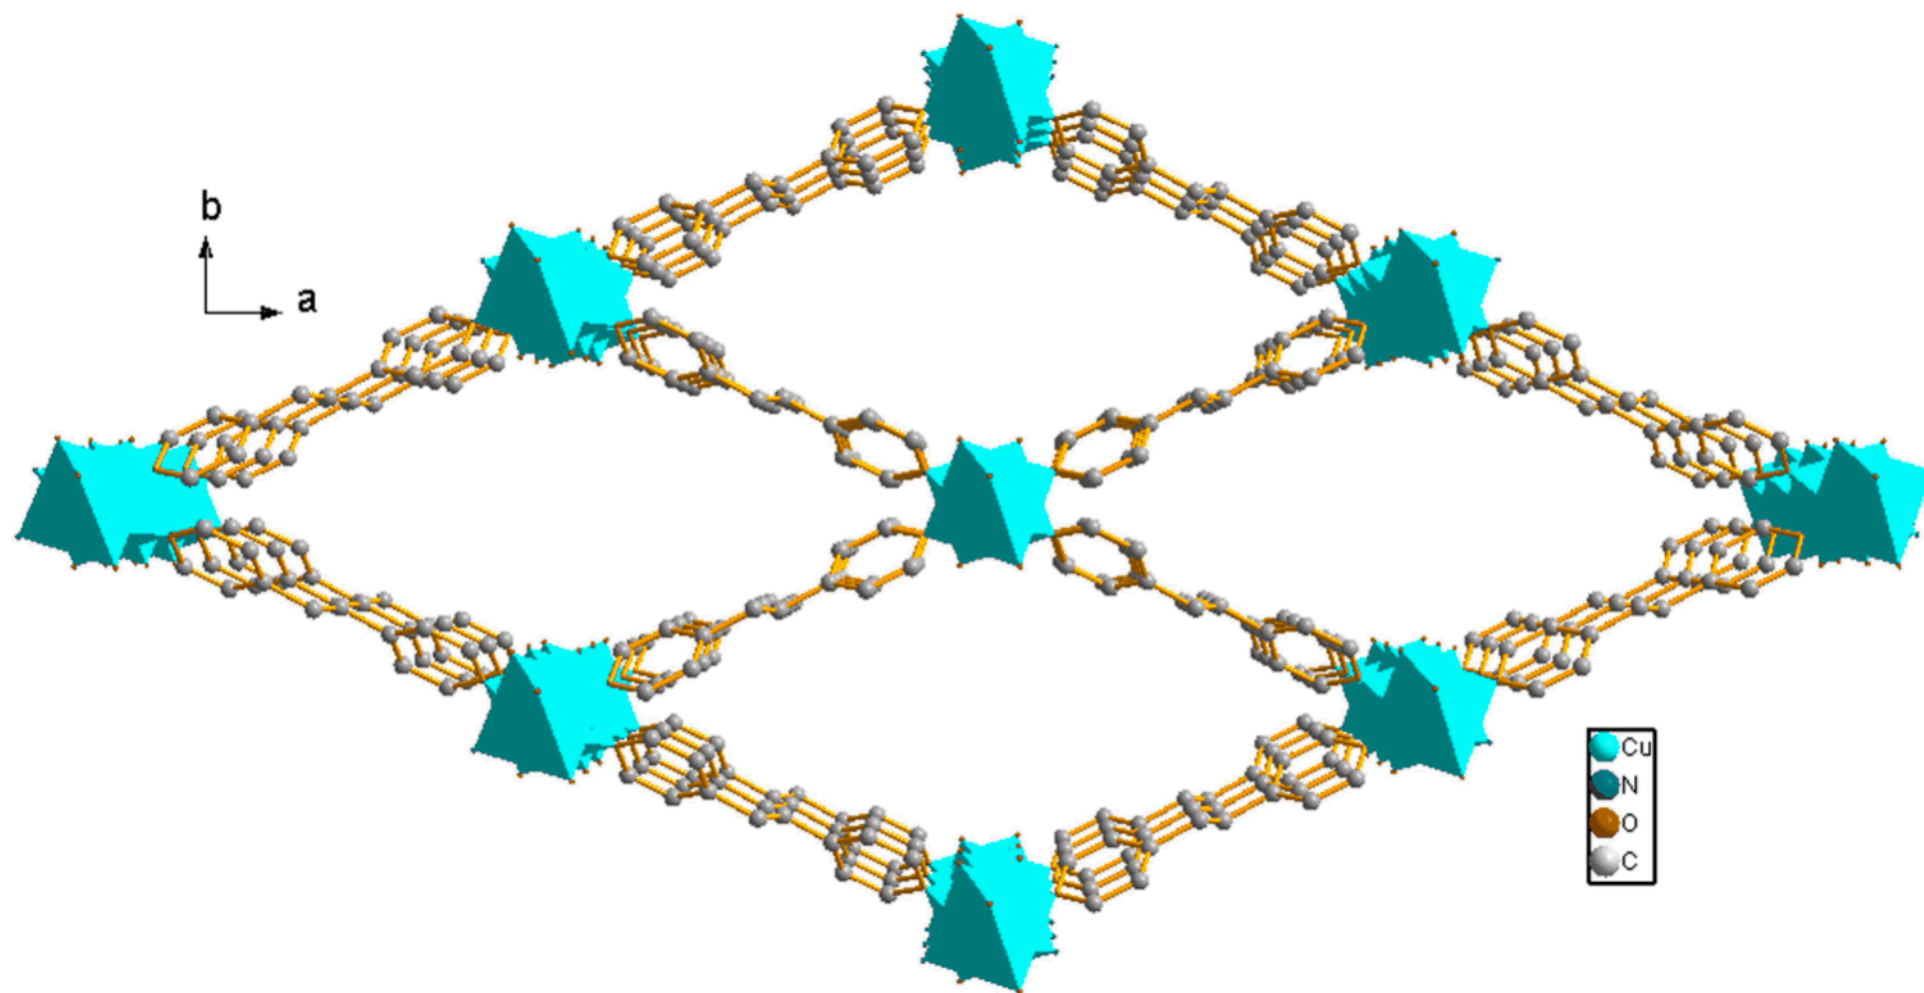

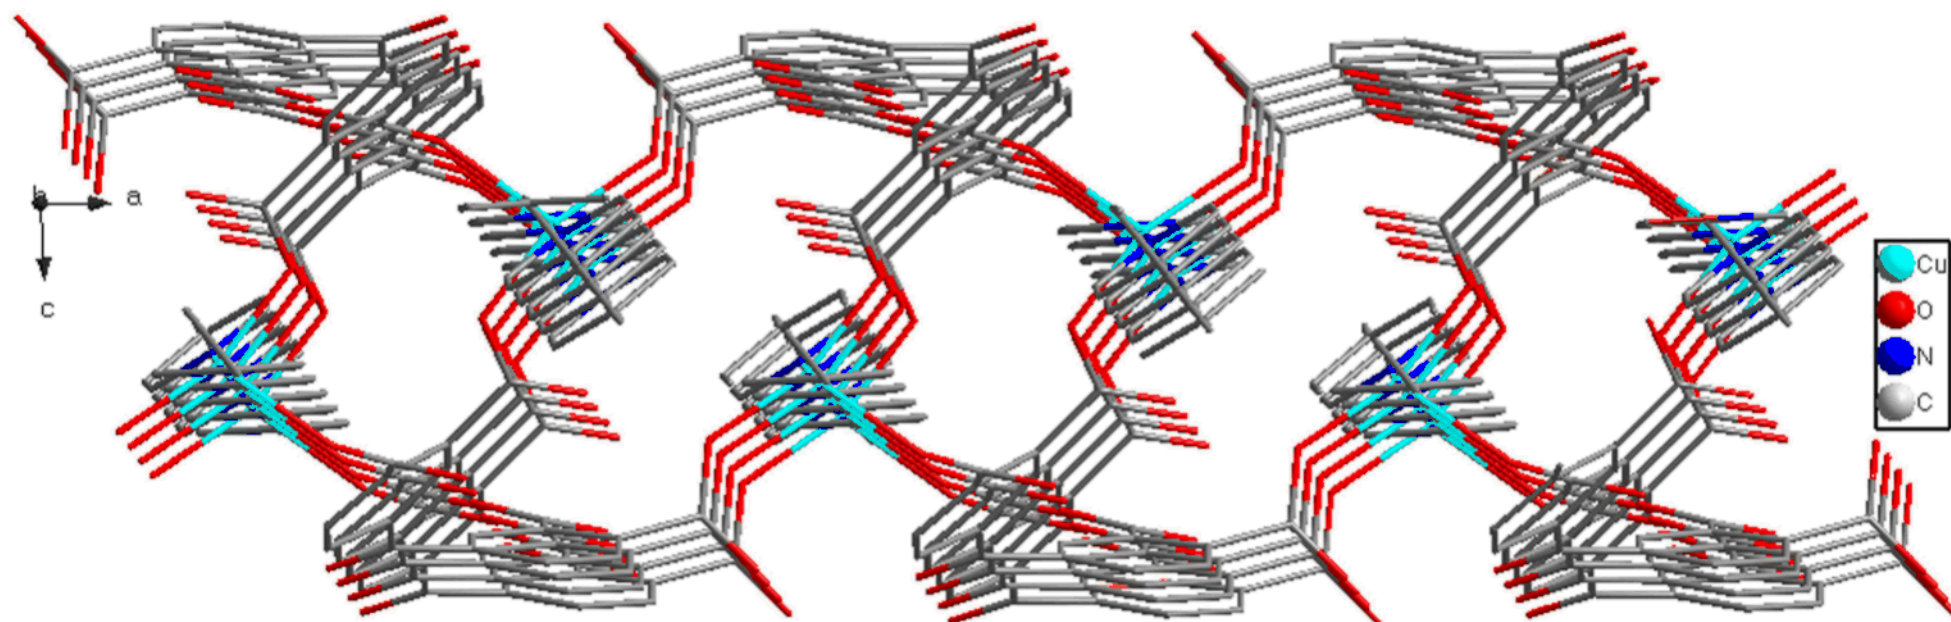

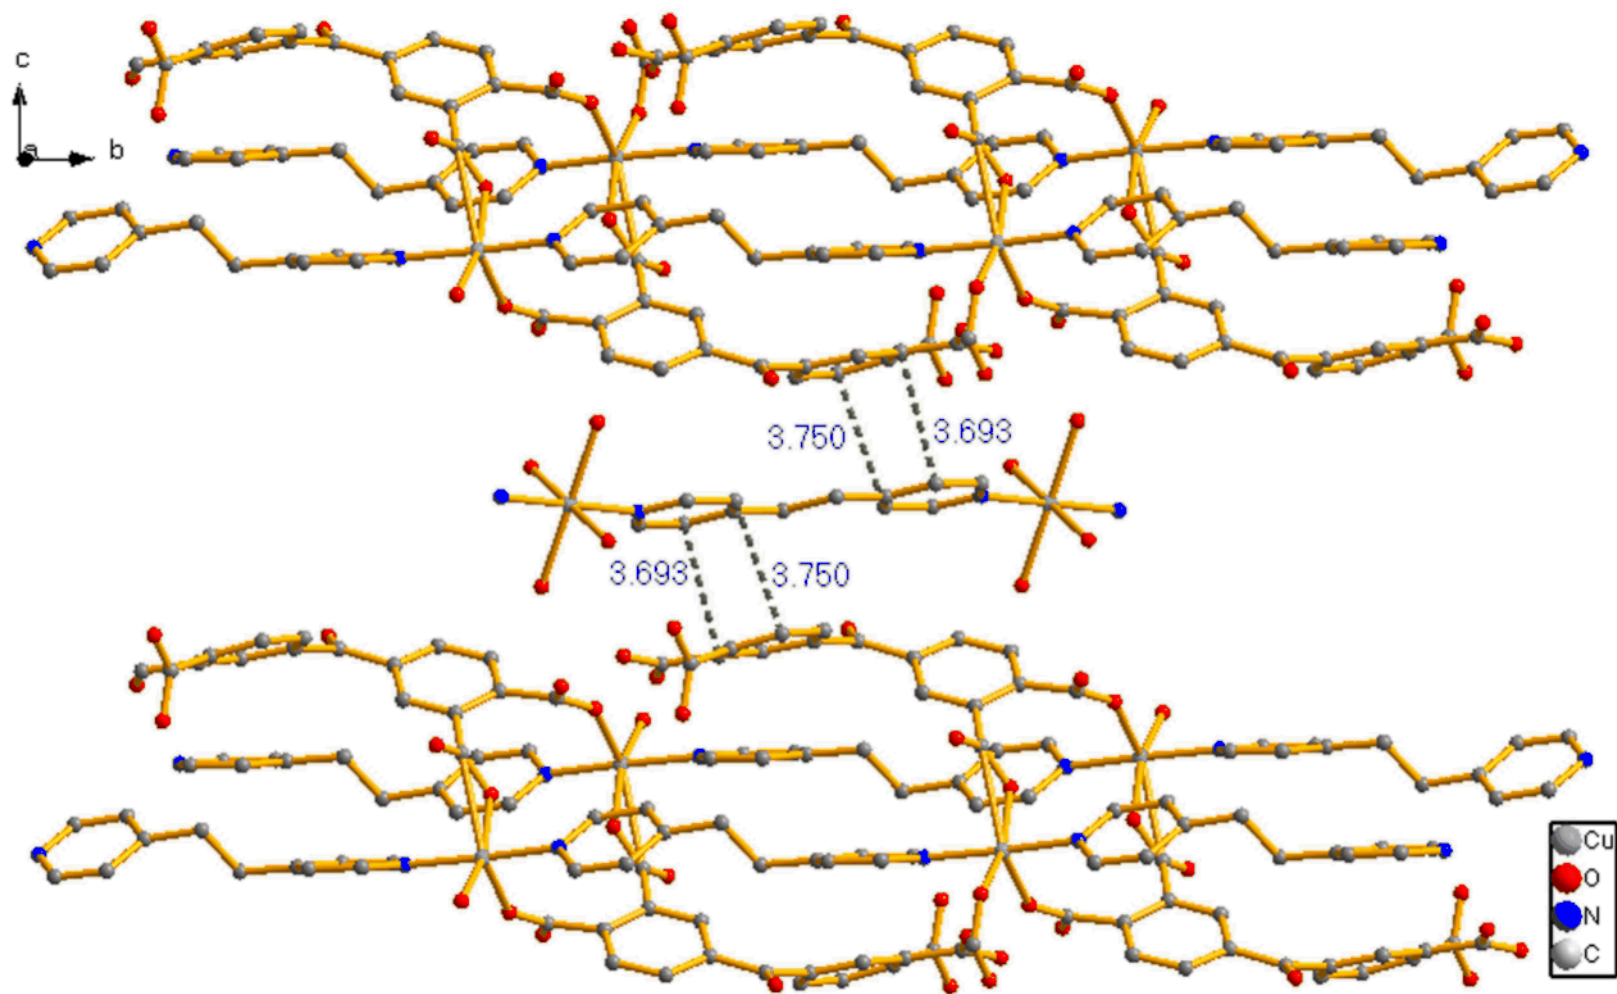

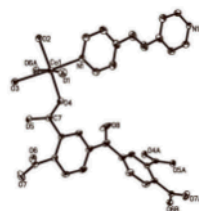

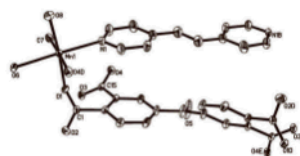

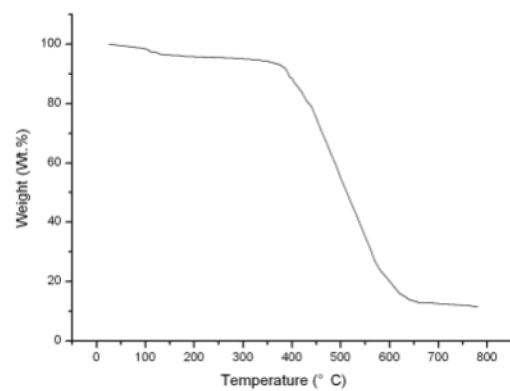



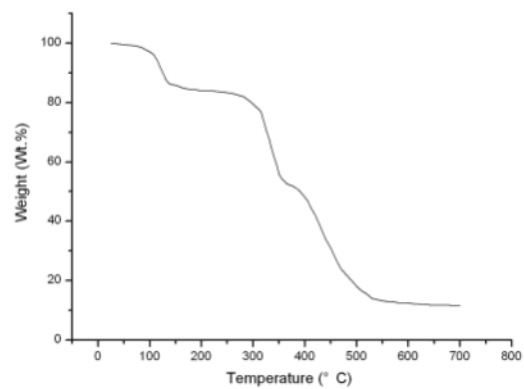

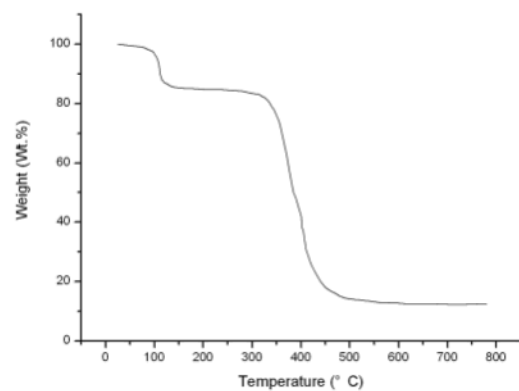

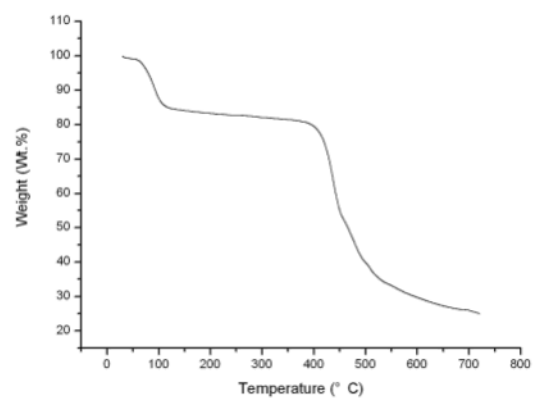

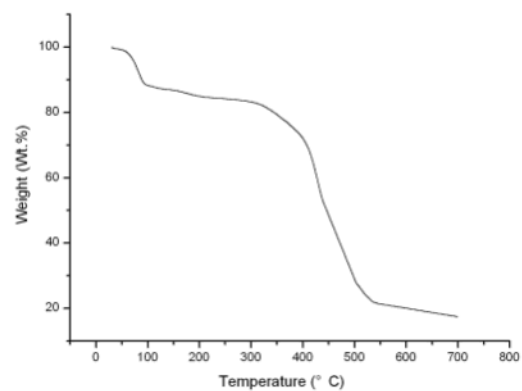

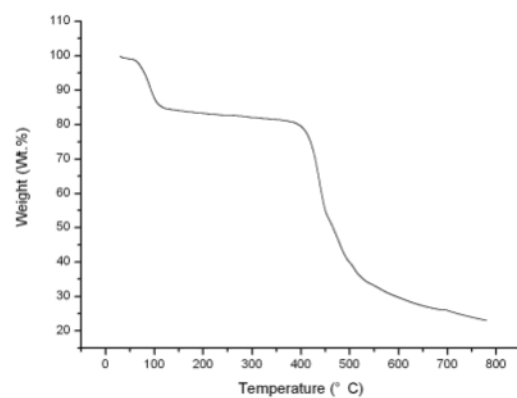

Supplement: b805727c.pdf [file b805727c.pdf]
